# Supplementary material
Source: Springer Nature journal article supplement (https://www.springermedizin.de/resource/supplementary/13002_2008_136_MOESM8_ESM.pdf/9627318)
Supplement: MOESM8 [file 9627318]

19

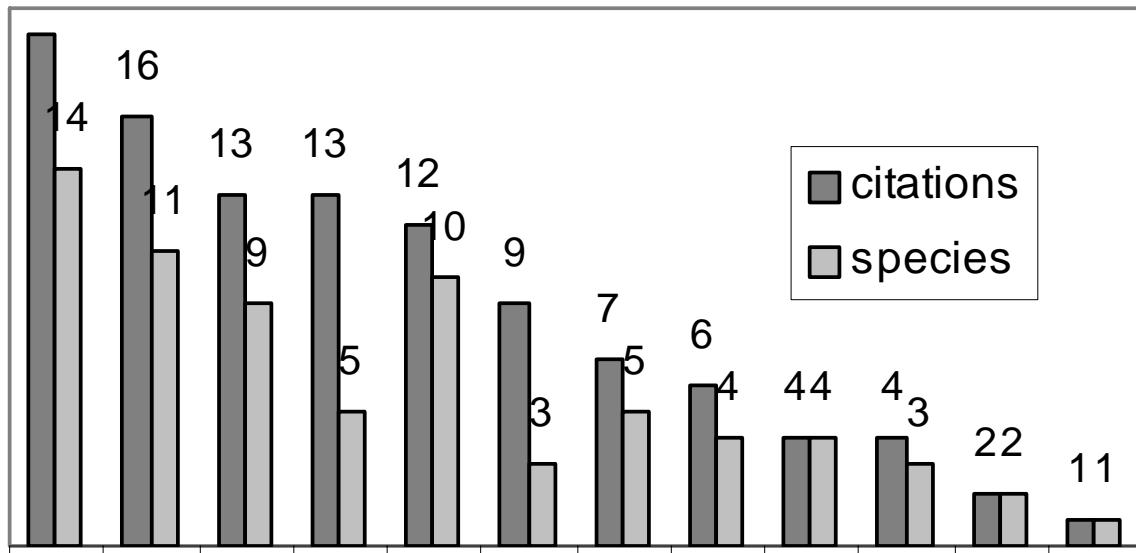

digestive system diseases

injuries

dermatologic affections

general state of health

urinary tract diseases

colds, respiratory system diseases

circulatory system diseases

oropharyngeal affections

gynaecologic, obstetric, puerperal troubles

ophthalmic affections

nervous system diseases

muscular and skeletal system diseases
